# Supplementary material
Source: ML conference proceedings conference paper supplement (https://openreview.net/forum?id=DydCqKa6AH)
Supplement: supplementary_material [file attachment]

## Appendix

We present additional details and experiments of the proposed CityWalkers dataset and the PedGen model for pedestrian movement generation. In Sec. A, we introduce more details and statistics of CityWalkers. Sec. B benchmarks the noise level of our automatic labeling pipeline. In Sec. C, we discuss implementation details of PedGen. Sec. D provides more visualizations of the dataset and the qualitative results. An ablation study on label filtering is presented in Sec. E, and an ablation study on the noises in input conditions is shown in Sec. F. We discuss broader impacts of our work in Sec. G.

### A MORE DETAILS ON CITYWALKERS

We manually review all videos to ensure the raw data quality and scene diversity. We collected 728 such videos and split each one into 5-second clips, with an interval of 25 seconds between subsequent clips. We then perform a second check round to examine whether all clips are in urban environments, have proper lighting conditions without much motion blur, and do not contain abrupt viewpoint changes. To prevent the leaking of personally identifiable information, we also blur the faces and license plates with mosaicing tools (Xu et al., 2020). In total, 22,698 clips are collected, each representing a different urban scene. All video clips are decomposed into image sequences with a frame rate of 30 fps. We keep pedestrians tracked consecutively for at least 10 frames, and pass it together with the camera angular velocity predicted by DPVO (Teed et al., 2023) to the WHAM network to get pseudo-labels for 4D global pedestrian movement. For each pedestrian, WHAM outputs both its movement in the global frame  $\mathcal{X}^g = \{t_t^g, \phi_t^g, \theta_t, \beta_t\}_{t=1}^T$ , and in the local camera frame  $\mathcal{X}^c = \{t_t^{c(t)}, \phi_t^{c(t)}, \theta_t, \beta_t\}_{t=1}^T$ , note that the local camera frame  $c(t)$  is varying with time as the camera is also moving in the video. To align the context information in the local camera frame at a specific timestep  $\tau$  and the future pedestrian movement label in the global frame, we define an additional transformation matrix  $\mathbf{T}_g^{c(\tau)} = [\mathbf{R}_g^{c(\tau)} | \mathbf{t}_g^{c(\tau)}]$  with  $\mathbf{R}_g^{c(\tau)} = \phi_\tau^{c(\tau)}(\phi_\tau^g)^{-1}$ ,  $\mathbf{t}_g^{c(\tau)} = \mathbf{t}_\tau^{c(\tau)} - \phi_\tau^{c(\tau)}(\phi_\tau^g)^{-1}\mathbf{t}_\tau^g$  and apply  $\mathbf{T}_g^{c(\tau)}$  on the global human motion  $\mathcal{X}^g$ . The result is the global pedestrian movement in the fixed local camera coordinate  $c(\tau)$ , which can be paired with the context information as  $\{\mathcal{I}_\tau, \mathcal{I}_\tau^d, \mathcal{I}_\tau^s, \mathcal{X}^{c(\tau)}\}$  to get training and validation samples. We use the CityScapes (Cordts et al., 2016) classes for the semantic map, as they contain common classes in urban scenes, such as buildings, sidewalks, and cars.

Table 4 compares CityWalkers to other human motion datasets. CityWalkers has the most diverse human subjects and scenes compared to other human motion datasets and is the only dataset that uses web source videos and pseudo-labels. We provide further statistics regarding the pedestrian movements in CityWalkers in Fig. 6. Plots A-D display key motion characteristics. Plot A shows that our dataset captures motions with a wide range of typical human walking speeds. As evidenced by Plot B and C, our data also contains substantial samples of varying stride patterns. We also demonstrate the diversity of movement directions with Plot D, which represents the change in orientation across the recorded motion. In addition, we plot pedestrian body shape statistics with Plot E and Plot F. We look at the height of pedestrians in Plot E and their waist-to-height ratio in Plot F, as an indicator for the mass index. Fig. 7 demonstrates the list of cities and countries in CityWalkers and its pedestrian attributes roughly estimated by an off-the-shelf VLM (Chen et al., 2023b). CityWalkers covers most European countries and some Asian countries, and we plan to add more locations in the future. As most of the places in CityWalkers have many tourists, its pedestrians are from all over the world, and the age groups and genders are well-represented.

### B BENCHMARKING THE NOISE LEVEL OF CITYWALKERS

Though we have applied several techniques to improve the quality of pseudo-labels by using state-of-the-art models and filtering wrong predictions, label noise from web videos is still inevitable and hence it is important to benchmark the accuracy of our data autolabeling pipeline. We use the SLOPER4D dataset (Dai et al., 2023), collected in a similar outdoor setting as CityWalkers with a much smaller scale. The SLOPER4D dataset has ground-truth human motion and scene-depth labels annotated from the 3D LiDAR point clouds. We evaluate the accuracy of the 4D human motion estimation with the Procrustes-Aligned Mean Per Joint Position Error (PA-MPJPE) and the World-Aligned Mean Per Joint Position Error (WA-MPJPE), and the accuracy of the monocular depth

Table 4: **Comparison of human motion datasets.** We compare CityWalkers with datasets that do not have scene context (top), datasets that provide scene context labels but are captured in controlled environments (middle), and datasets that are captured in the wild (bottom). CityWalkers has the most number of scenes and subjects among all datasets and is the only dataset that uses web source videos and pseudo-labels.

| Datasets                            | Web source | Pseudo-labels | # Subjects     | # Scenes      | Hours       | Depth | Segmentation | SMPL |
|-------------------------------------|------------|---------------|----------------|---------------|-------------|-------|--------------|------|
| AMASS (Mahmood et al., 2019)        | -          | -             | 344            | -             | 62.9        | -     | -            | ✓    |
| DNA-Rendering (Cheng et al., 2023b) | -          | -             | 1,500          | -             | 3.2         | -     | -            | ✓    |
| PROX (Hassan et al., 2019)          | -          | -             | 20             | 12            | 0.9         | ✓     | ✓            | ✓    |
| RELI11D (Yan et al., 2024)          | -          | -             | 10             | 7             | 3.3         | ✓     | -            | ✓    |
| RICH (Huang et al., 2022)           | -          | -             | 22             | 5             | 2.7         | ✓     | -            | ✓    |
| TRUMANS (Jiang et al., 2024)        | -          | -             | 7              | 100           | 15.0        | ✓     | ✓            | ✓    |
| 3DPW (Von Marcard et al., 2018)     | -          | -             | 7              | 60            | 0.5         | -     | -            | ✓    |
| EMDB (Kaufmann et al., 2023)        | -          | -             | 10             | 81            | 1.0         | -     | -            | ✓    |
| SLOPER4D (Dai et al., 2023)         | -          | -             | 12             | 10            | 1.4         | ✓     | -            | ✓    |
| JRDB-Pose (Vendrow et al., 2023)    | -          | -             | 5,022          | 54            | 1.1         | ✓     | ✓            | -    |
| <b>CityWalkers (ours)</b>           | ✓          | ✓             | <b>120,914</b> | <b>16,215</b> | <b>30.8</b> | ✓     | ✓            | ✓    |

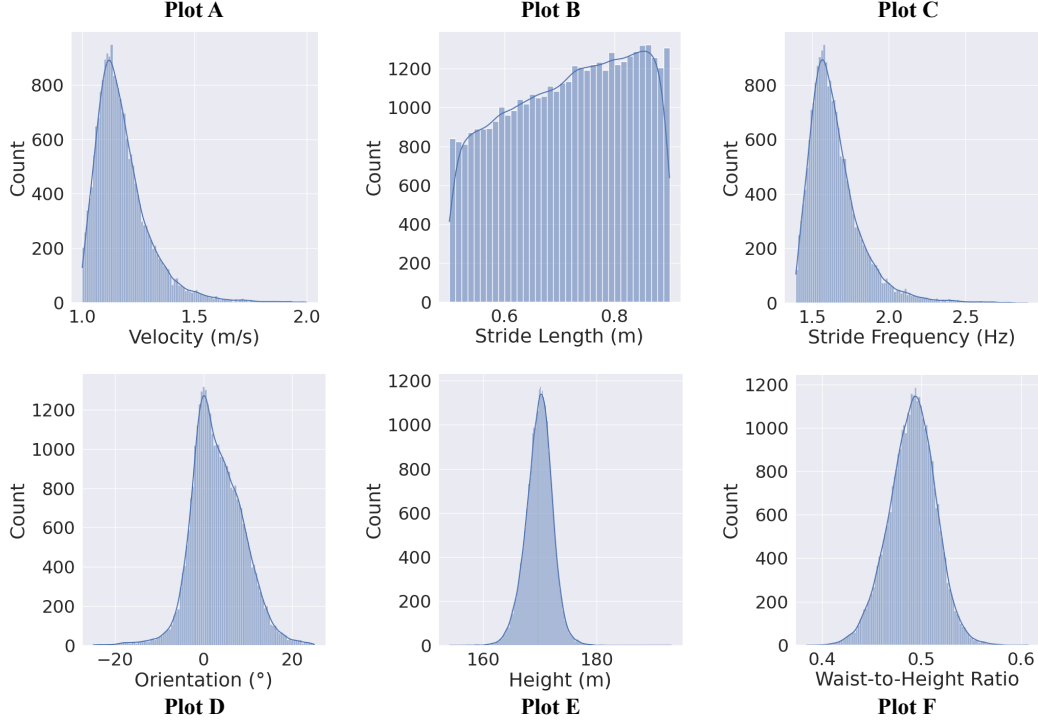

Figure 6: **Pedestrian movement statistics of CityWalkers.**

estimation with the absolute relative error (REL) and the Root Mean Squared Error (RMSE). The results are shown in Tab. 5. We want to stress that while encountering label noise is inevitable, web videos are necessary to learn a generalizable pedestrian movement generation model with natural pedestrian behaviors and diverse motion contexts.

Table 5: **Benchmarking results of our autolabeling pipeline on the SLOPER4D dataset.**

| 4D Human Motion |                 | Depth |        |
|-----------------|-----------------|-------|--------|
| PA-MPJPE (mm) ↓ | WA-MPJPE (mm) ↓ | REL ↓ | RMSE ↓ |
| 42.76           | 297.72          | 0.33  | 5.46   |





and generated pedestrian movements of PedGen, as well as the scene context labels by unprojecting the image pixels to the 3D space according to the depth label. We can see that the ground truth movements align well with the geometry of the scene, showing the quality of the movement and scene context labels. The generated pedestrian movements also match well with their surrounding environments in 3D. Fig. 11 shows a qualitative comparison between PedGen and other baselines. It can be noticed that PedGen can generate more natural and diverse motions with different poses, gestures, and hand movements. It also aligns with the surrounding environment better after being conditioned on the context factors. Fig. 12 shows samples of the CARLA test set that we used to evaluate the zero-shot generalization ability of PedGen. We display a handful of urban scenes with diverse objects and layouts, all of which reflect test set diversity. Fig.13 shows the application of PedGen in simulated environments by populating urban scenes in CARLA with realistic multi-pedestrian movements. In Fig. 14, we lay out a wide array of scenes in CityWalkers with diverse locations, weather, crowd density, and time of day to show the diversity of the urban scenes.

## E ABLATION ON AUTOMATIC LABEL FILTERING

An ablation study on the number of filtering iterations can be found in Tab. 7. Fig.15 shows the application of PedGen in real-world pedestrian movement prediction by generating diverse long-term pedestrian movements in a 3D Gaussian-Splatting reconstructed Chen et al. (2024) scenario in Waymo. The results further demonstrate the practicality of PedGen in real-world applications. Fig. 16 shows visualizations of the automatically filtered anomaly samples. We can observe that the anomaly labels in the first iteration of anomaly filtering have drastic errors in the body pose or do not belong to pedestrian movements. In contrast, the anomaly labels in the second iteration of anomaly filtering have much smaller errors with minor deviations in the local movements and could also contain false positives with novel movements. We find that two iterations with a reconstruction error threshold of 10 are sufficient to filter most low-quality labels with the best model performance.

## F ABLATION ON INPUT NOISES

To handle real-world scenarios where conditional inputs are unreliable, like depth sensing in autonomous driving, we conduct additional experiments on each context factor to study its sensitivity to input noises. We add Gaussian noises with a standard deviation of 0.5 on the scene point cloud, the SMPL beta vector, and the goal position. The results are shown in the table below:

Table 6: Ablation on the model sensitivity to noises in input conditions.

| Context Factor | Metric (w/ noise $\sigma = 0.5$ ) |        |        |        |
|----------------|-----------------------------------|--------|--------|--------|
|                | mADE ↓                            | aADE ↓ | mFDE ↓ | aFDE ↓ |
| Scene          | 1.69                              | 4.02   | 2.74   | 7.41   |
| Human          | 1.83                              | 3.50   | 3.08   | 6.22   |
| Goal           | 1.61                              | 2.33   | 2.55   | 2.79   |

We can see that all factors suffer from input noises, with the goal having the most degraded performance, where mADE increases by 168% and aADE increases by 114%. The scene and the human factors have increased less in terms of the average metrics (aADE increases by 7% for scene context and increases by 8% for human context) and still performs better than the baseline without context. However, they are less robust in terms of the min metrics (mADE increases by 52% for scene context and increases by 68% for human context) as it is hard to predict the exact future movement of the dataset with noisy inputs.

## G BROADER IMPACTS

Our work can benefit many applications. For example, city designers can simulate pedestrian movements to optimize public areas and transportation systems. Forecasting future pedestrian movements is also crucial for the safe deployment of autonomous vehicles. The diverse urban scenes and pedestrians in the CityWalkers dataset could also support future research directions besides

pedestrian movement generation, such as relation modeling between real-world scenes and humans and integration of realistic human movements and urban scenes into embodied AI training.

Some potential negative societal impacts of our work include using the released data for surveillance applications by modeling and predicting pedestrian behaviors and the risk of leaking personally identifiable information. It is also possible that our model could be misused to generate fake pedestrian movements of real-world humans. As discussed in the ethics statement, we will enforce practices to protect privacy (e.g., removing personally identifiable information) and add the user agreement and the license to our dataset to prevent misuse.

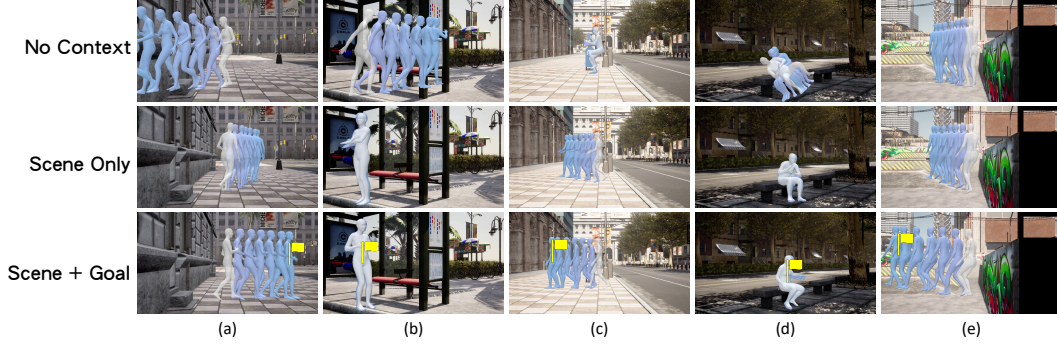

Figure 8: **Qualitative comparisons of the scene and the goal context.** We visualize the generated movements using no context factor, the ones using only the scene context, and the ones using both the scene and the goal context (marked as the yellow flag) in five environments in the CARLA simulator. The generated initial pose is colored in white. From the comparison between "No Context" and "Scene Only," we can see that (a) The generated movement with no context hits the wall, while the one with the scene context can navigate the sidewalk. (b): The generated movement with no context directly walks into the bus stop, while the model generates a standing pose with a reasonable direction after using the scene context. (c): The model generates a sitting pose and makes the movement float from the ground if no context is used, and it generates a walking motion while avoiding the obstacles in the front after using the scene context. (d): The sitting pose generated without context factors is jittering and has the wrong orientation, while the generated sitting pose is stable and more plausible after using the scene context. (e): The generated movement ignores the slope in the front without the context. Adding the scene context makes the model aware of the terrain and the movement to walk upward. From the comparison between "Scene Only" and "Scene + Goal", we can see that adding the goal context can make the movement reach the goal more precisely, while in some cases like (b) and (d), using the scene context alone can generate plausible human poses similar to the ones with the goal context.

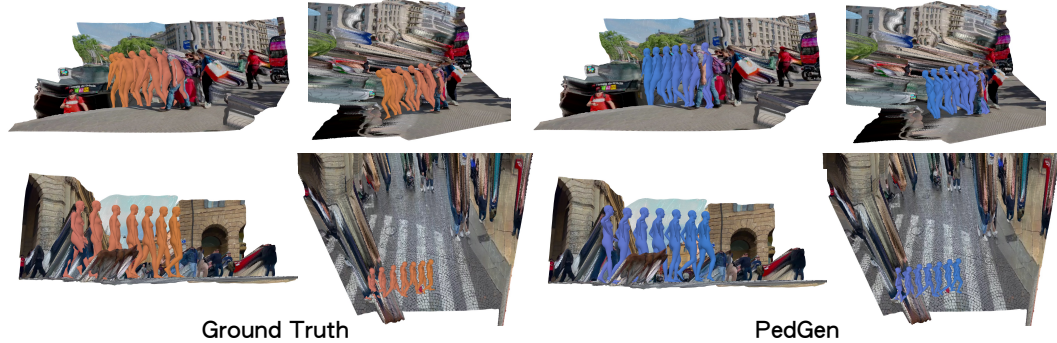

Figure 9: **Visualizations in 3D.** We visualize both the ground truth scene and movement labels (orange) and the generated movements by PedGen (blue) in multiple views in 3D by unprojecting the image pixels from the depth labels.

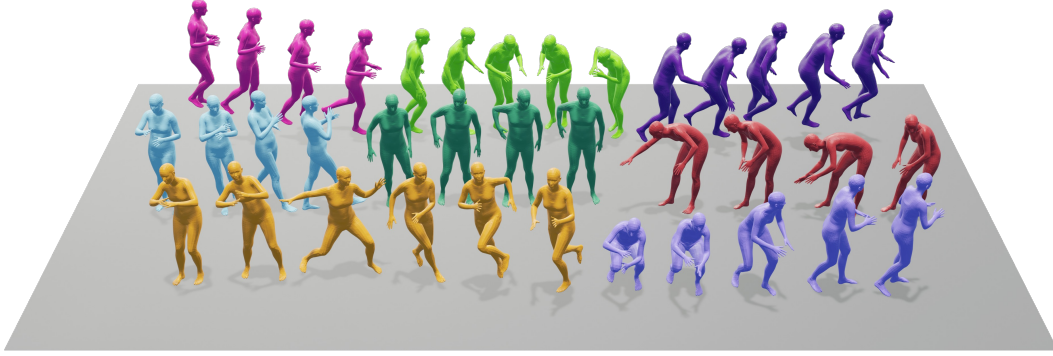

Figure 10: **Samples of 4D pedestrian movement labels in CityWalkers.** The text descriptions of the movements from top left to bottom right are: walking down stairs (pink), turning and lifting baggage up steps (light green), walking up stairs (dark purple), turning around with phone in hand (sky blue), moving hands to hip (dark green), wiping seats and tables (red), jumping and skipping around (yellow), taking photo and standing up (light purple).

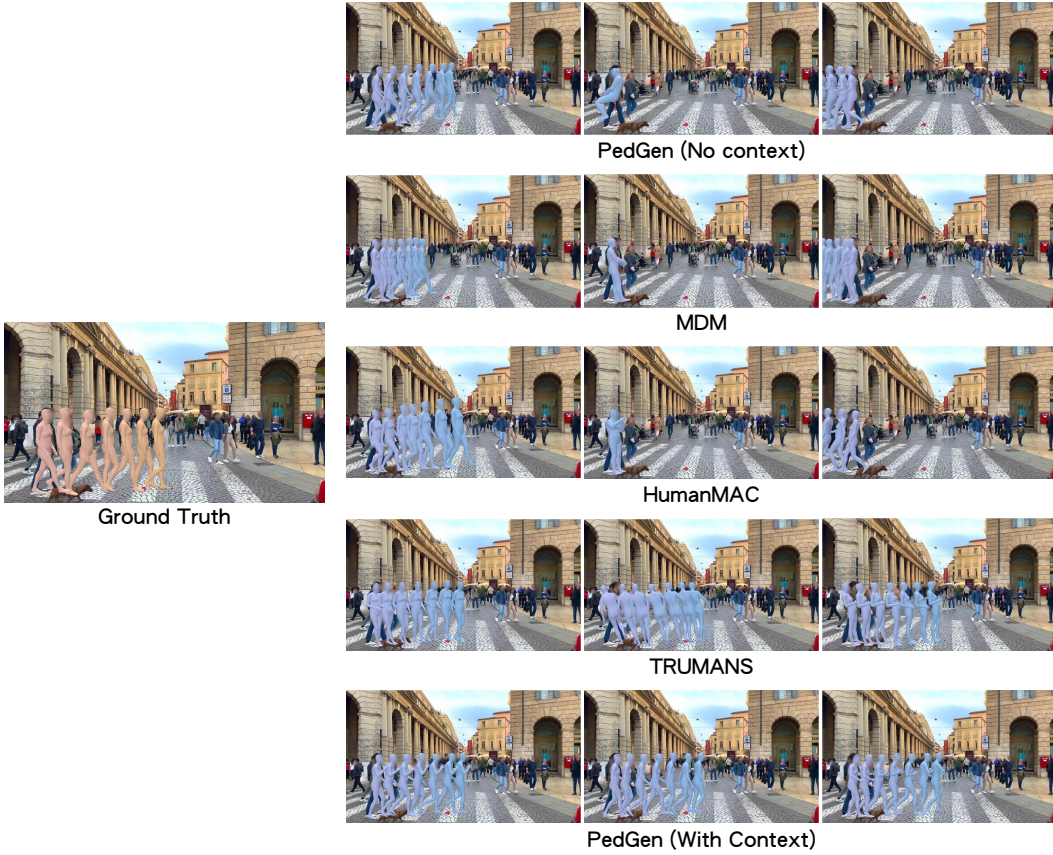

Figure 11: **Qualitative comparison results.** We visualize the generation results of PedGen compared to the other baselines and the ground truth. Three random samples are generated for each method.



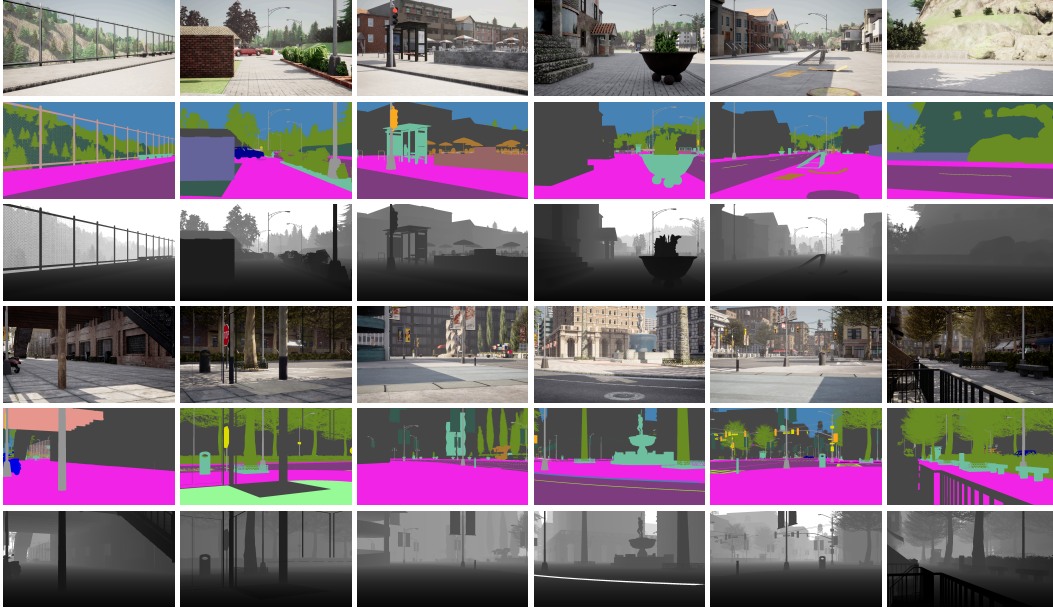

Figure 12: **Samples in the CARLA test set.** Each scene contains a rendered image, a semantic map, and a depth map.

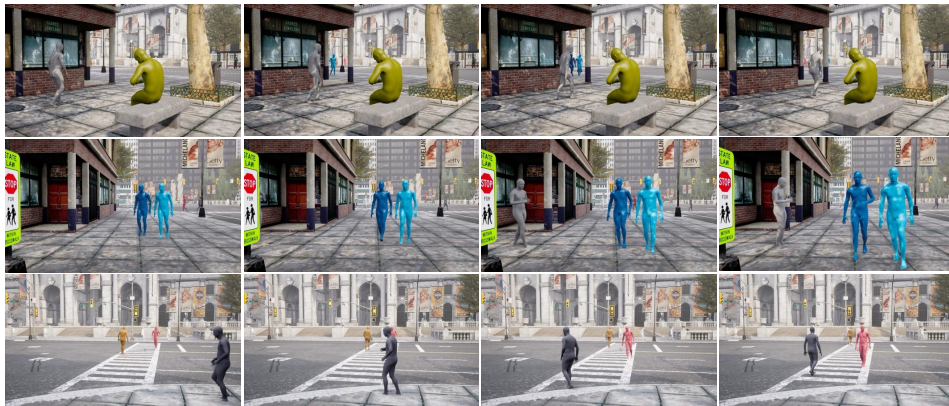

Figure 13: **Populating urban scenes in CARLA.** We generate multi-pedestrian movements using PedGen.



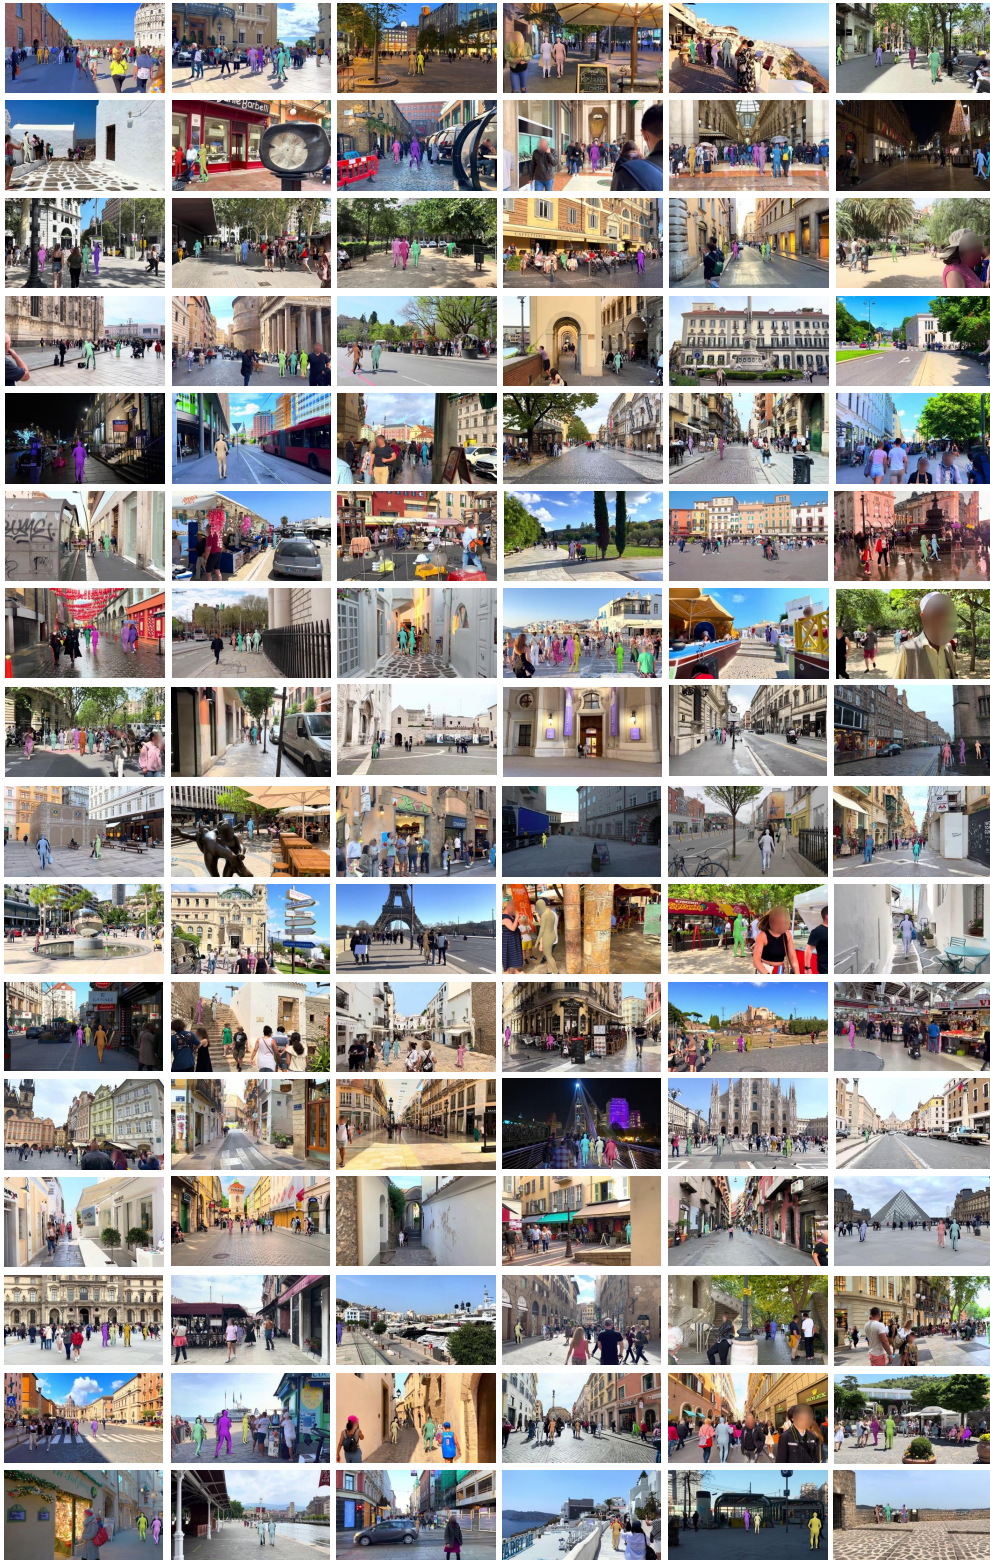

Figure 14: **Samples of real-world scenes in CityWalkers.** We visualize the extracted pedestrian 3D meshes in each scene.



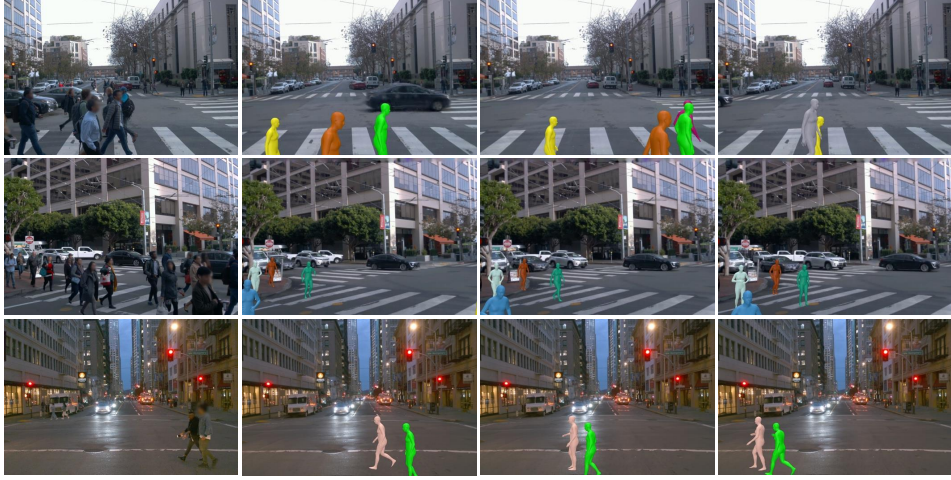

Figure 15: **Pedestrian movement prediction in Waymo.** We predict long-term pedestrian movements using PedGen.

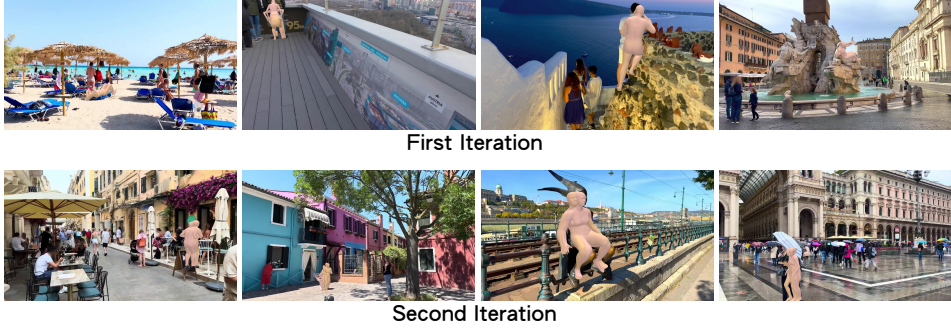

Figure 16: **Visualizations of anomaly labels in CityWalkers.** We visualize the filtered labels in the first and the second iterations of automatic anomaly label filtering.

Table 7: **Ablation on the number of filtering iterations.** We evaluate PedGen with no context on the CityWalkers validation set.

| Filtering Iterations | Metric      |             |             |             |
|----------------------|-------------|-------------|-------------|-------------|
|                      | mADE ↓      | aADE ↓      | mFDE ↓      | aFDE ↓      |
| 0                    | 1.17        | 4.45        | 1.64        | 8.31        |
| 1                    | 1.17        | <b>4.22</b> | 1.68        | <b>7.88</b> |
| 2                    | <b>1.13</b> | 4.32        | <b>1.60</b> | 8.09        |
| 3                    | 1.17        | 4.42        | 1.63        | 8.22        |
